# Supplementary material for: The Pleasure Sources Assessment (PSA): A new measure that predicts self-rated health and subjective well-being in a general Australian sample
Source: Research Square preprint supplement (doi:10.21203/rs.3.rs-6625617/v1), 2025-05-21
Supplement: Supplementary file 1 [file f8fbcc7fbe62d7b2c954d5be.xlsx]

## Sheet: Correlations
Correlations
		Your job	Your contact with family	Your contact with friends	Your contact with work colleagues	Socialising with strangers	Your pet/s	Spending time in nature	Sexual activity	Consuming food and/or drink	Cooking/preparing food	Humour	Physical exercise	Music (producing or listening)	Art (creating or viewing)	Theatre or other live performance	Reading	Dancing	Gardening or caring for plants	Watching movies or TV	Using social media	Religion or spirituality	Spending quiet time alone	Being productive	Using alcohol or other drugs	Caring for others	Watching sport	Parties, festivals, or clubbing	Spending time with a child or children	Risk-taking	Shopping	Belonging to a group, club, or team
Your job	Pearson Correlation	1	.290**	.286**	.593**	.257**	.075**	.187**	.153**	.154**	.196**	.176**	.236**	.128**	.107**	.155**	.143**	.173**	.183**	.063**	.100**	.159**	.096**	.309**	.056*	.210**	.061**	.108**	.200**	.121**	.077**	.182**
	Sig. (2-tailed)		1.24344e-41	1.58653e-40	1.0042e-194	8.1197e-33	0.00103747	6.34703e-18	3.55333e-12	1.31285e-12	1.91509e-19	5.40144e-16	7.59394e-28	4.13372e-09	9.44558e-07	1.05165e-12	4.99712e-11	2.46091e-15	3.82616e-17	0.0040611	5.02164e-06	4.24754e-13	1.1003e-05	1.96958e-47	0.0101994	4.02138e-22	0.00528453	7.36698e-07	3.21328e-20	3.10146e-08	0.000446565	8.90494e-17
	N	2091	2085	2085	2048	2083	1916	2082	2046	2086	2086	2083	2082	2088	2081	2078	2081	2074	2081	2088	2078	2055	2084	2082	2081	2084	2076	2077	2074	2078	2087	2066
Your contact with family	Pearson Correlation	.290**	1	.442**	.339**	.208**	.063**	.215**	.161**	.173**	.151**	.201**	.221**	.108**	.053*	.141**	.146**	.141**	.161**	.085**	.087**	.097**	.067**	.273**	0.0358946	.319**	.157**	.121**	.466**	.070**	.063**	.190**
	Sig. (2-tailed)	1.24344e-41		1.02324e-112	9.44689e-57	3.489e-24	0.00413355	7.64366e-26	2.03172e-14	3.83716e-17	2.14036e-13	1.10833e-22	2.75425e-27	1.41088e-07	0.0105252	8.09712e-12	1.45512e-12	9.95201e-12	5.60419e-15	3.63276e-05	2.43645e-05	3.60648e-06	0.00112901	2.48454e-41	0.0837583	1.36122e-56	2.15464e-14	4.28321e-09	2.19791e-125	0.000766262	0.00216399	2.5501e-20
	N	2085	2353	2343	2069	2336	2075	2340	2243	2347	2341	2341	2340	2346	2337	2330	2338	2317	2336	2345	2330	2294	2342	2340	2322	2342	2331	2330	2319	2330	2345	2315
Your contact with friends	Pearson Correlation	.286**	.442**	1	.472**	.346**	.192**	.269**	.257**	.318**	.227**	.348**	.221**	.250**	.210**	.335**	.192**	.302**	.148**	.208**	.123**	.098**	.053*	.259**	.172**	.322**	.093**	.304**	.250**	.110**	.143**	.357**
	Sig. (2-tailed)	1.58653e-40	1.02324e-112		2.22984e-115	1.08839e-66	1.3964e-18	4.62236e-40	2.56428e-35	2.35607e-56	9.69115e-29	8.55507e-68	3.17703e-27	1.23081e-34	1.00739e-24	2.37148e-62	6.20984e-21	5.17669e-50	7.05804e-13	3.16047e-24	2.64883e-09	2.45303e-06	0.0100281	4.01045e-37	6.13138e-17	1.1973e-57	7.51596e-06	4.82242e-51	2.46005e-34	9.25268e-08	4.02062e-12	1.21261e-70
	N	2085	2343	2353	2067	2337	2072	2342	2245	2346	2342	2341	2341	2344	2338	2329	2339	2316	2337	2345	2331	2295	2343	2342	2324	2340	2332	2330	2320	2332	2346	2315
Your contact with work colleagues	Pearson Correlation	.593**	.339**	.472**	1	.328**	.156**	.225**	.194**	.215**	.225**	.222**	.203**	.167**	.118**	.222**	.162**	.221**	.181**	.144**	.096**	.106**	.072**	.275**	.118**	.260**	.083**	.195**	.230**	.133**	.119**	.270**
	Sig. (2-tailed)	1.0042e-194	9.44689e-57	2.22984e-115		5.5204e-53	7.3805e-12	5.02699e-25	9.34139e-19	4.85697e-23	4.67543e-25	1.61107e-24	9.84274e-21	2.2693e-14	7.93052e-08	1.99177e-24	1.33821e-13	3.95231e-24	1.16075e-16	4.0627e-11	1.31734e-05	1.50526e-06	0.00101531	3.50685e-37	6.76416e-08	2.96254e-33	0.000177063	3.41317e-19	3.28652e-26	1.43872e-09	5.31727e-08	1.36492e-35
	N	2048	2069	2067	2074	2068	1907	2065	2031	2069	2069	2065	2065	2071	2064	2063	2064	2057	2065	2071	2062	2040	2067	2065	2064	2068	2059	2061	2059	2061	2070	2052
Socialising with strangers	Pearson Correlation	.257**	.208**	.346**	.328**	1	.066**	.215**	.189**	.162**	.196**	.205**	.278**	.171**	.190**	.225**	.081**	.234**	.167**	.083**	.123**	.138**	-0.0183196	.209**	.137**	.284**	.120**	.382**	.205**	.272**	.083**	.351**
	Sig. (2-tailed)	8.1197e-33	3.489e-24	1.08839e-66	5.5204e-53		0.00275596	6.33582e-26	1.83715e-19	3.17312e-15	1.35129e-21	1.35491e-23	9.87383e-43	1.04493e-16	2.75878e-20	4.13357e-28	8.43156e-05	4.91963e-30	5.07883e-16	5.77437e-05	3.06006e-09	3.96996e-11	0.376141	2.07237e-24	3.5935e-11	1.91628e-44	7.08599e-09	1.73331e-81	2.18171e-23	9.32219e-41	5.93158e-05	4.90448e-68
	N	2083	2336	2337	2068	2346	2069	2337	2239	2339	2334	2335	2333	2337	2330	2324	2332	2309	2330	2339	2324	2288	2336	2334	2317	2334	2325	2325	2312	2325	2338	2309
Your pet/s	Pearson Correlation	.075**	.063**	.192**	.156**	.066**	1	.255**	.054*	.157**	.119**	.187**	.066**	.140**	.140**	.150**	.141**	.122**	.138**	.123**	.054*	0.00711125	.106**	.101**	0.0213895	.106**	-0.0138915	0.0384189	-.061**	-0.0048354	.062**	.090**
	Sig. (2-tailed)	0.00103747	0.00413355	1.3964e-18	7.3805e-12	0.00275596		5.44482e-32	0.0155993	5.76544e-13	5.40648e-08	1.00949e-17	0.0026097	1.32665e-10	1.74462e-10	6.98792e-12	1.17781e-10	2.80891e-08	2.55771e-10	1.77266e-08	0.014695	0.747855	1.21348e-06	3.69614e-06	0.331061	1.37853e-06	0.527701	0.0806897	0.00590002	0.826183	0.00478025	4.05177e-05
	N	1916	2075	2072	1907	2069	2081	2071	2019	2076	2076	2074	2073	2075	2072	2067	2072	2057	2077	2077	2069	2046	2073	2074	2067	2075	2069	2068	2056	2065	2076	2057
Spending time in nature	Pearson Correlation	.187**	.215**	.269**	.225**	.215**	.255**	1	.181**	.200**	.195**	.215**	.381**	.272**	.265**	.225**	.237**	.249**	.444**	0.00836153	-.047*	.149**	.258**	.279**	.051*	.242**	0.00864593	.121**	.192**	.131**	-0.0355182	.180**
	Sig. (2-tailed)	6.34703e-18	7.64366e-26	4.62236e-40	5.02699e-25	6.33582e-26	5.44482e-32		6.56089e-18	1.77738e-22	1.4895e-21	9.11901e-26	8.93247e-82	6.17166e-41	6.70685e-39	3.37605e-28	4.42893e-31	4.81758e-34	1.77048e-113	0.685889	0.024579	8.92834e-13	5.80587e-37	3.87366e-43	0.0140037	2.11119e-32	0.676588	4.34759e-09	1.01169e-20	1.92935e-10	0.0857052	3.03618e-18
	N	2082	2340	2342	2065	2337	2071	2350	2244	2343	2338	2338	2338	2341	2335	2328	2337	2314	2335	2342	2328	2292	2340	2338	2321	2338	2330	2328	2316	2329	2342	2312
Sexual activity	Pearson Correlation	.153**	.161**	.257**	.194**	.189**	.054*	.181**	1	.299**	.235**	.210**	.206**	.246**	.125**	.159**	0.0166202	.175**	.083**	.050*	-0.00688278	.044*	0.00511843	.082**	.200**	.168**	.128**	.267**	.151**	.246**	.070**	.144**
	Sig. (2-tailed)	3.55333e-12	2.03172e-14	2.56428e-35	9.34139e-19	1.83715e-19	0.0155993	6.56089e-18		1.11754e-47	1.34977e-29	7.34815e-24	6.37588e-23	2.5262e-32	2.79857e-09	4.28277e-14	0.431426	7.41958e-17	7.57902e-05	0.0187758	0.744856	0.0390838	0.808524	0.000105417	1.07439e-21	1.34656e-15	1.37632e-09	1.08688e-37	8.19228e-13	3.75248e-32	0.000918289	1.03383e-11
	N	2046	2243	2245	2031	2239	2019	2244	2252	2246	2247	2241	2241	2245	2242	2237	2243	2230	2243	2245	2238	2205	2244	2241	2237	2244	2238	2235	2229	2236	2247	2221
Consuming food and/or drink	Pearson Correlation	.154**	.173**	.318**	.215**	.162**	.157**	.200**	.299**	1	.427**	.358**	.132**	.215**	.199**	.242**	.188**	.191**	.129**	.284**	.167**	.041*	.149**	.211**	.304**	.204**	.063**	.211**	.074**	.088**	.232**	.158**
	Sig. (2-tailed)	1.31285e-12	3.83716e-17	2.35607e-56	4.85697e-23	3.17312e-15	5.76544e-13	1.77738e-22	1.11754e-47		1.4207e-104	7.32848e-72	1.27237e-10	5.92841e-26	2.90594e-22	2.16241e-32	4.34369e-20	1.85677e-20	3.79671e-10	6.67835e-45	3.91603e-16	0.0472843	4.61664e-13	6.3562e-25	6.9206e-51	1.67304e-23	0.00216386	7.00656e-25	0.000364778	2.08916e-05	3.45797e-30	2.05775e-14
	N	2086	2347	2346	2069	2339	2076	2343	2246	2357	2345	2346	2344	2350	2340	2333	2342	2321	2340	2350	2334	2298	2346	2346	2327	2345	2334	2335	2321	2335	2349	2318
Cooking/preparing food	Pearson Correlation	.196**	.151**	.227**	.225**	.196**	.119**	.195**	.235**	.427**	1	.244**	.242**	.192**	.207**	.163**	.148**	.151**	.289**	.089**	.077**	.074**	.142**	.190**	.190**	.291**	.110**	.165**	.138**	.149**	.142**	.103**
	Sig. (2-tailed)	1.91509e-19	2.14036e-13	9.69115e-29	4.67543e-25	1.35129e-21	5.40648e-08	1.4895e-21	1.34977e-29	1.4207e-104		4.18778e-33	1.35762e-32	8.13054e-21	3.88012e-24	2.13191e-15	5.46457e-13	3.05078e-13	2.6319e-46	1.63497e-05	0.000191505	0.000362769	4.3639e-12	1.48002e-20	2.56411e-20	7.60507e-47	1.11829e-07	1.2684e-15	2.38663e-11	4.95424e-13	5.12464e-12	6.17942e-07
	N	2086	2341	2342	2069	2334	2076	2338	2247	2345	2353	2341	2341	2344	2338	2328	2341	2316	2339	2345	2334	2294	2344	2340	2324	2340	2332	2329	2319	2330	2346	2314
Humour	Pearson Correlation	.176**	.201**	.348**	.222**	.205**	.187**	.215**	.210**	.358**	.244**	1	.184**	.364**	.260**	.310**	.234**	.255**	.132**	.280**	.146**	.083**	.178**	.254**	.137**	.235**	.105**	.188**	.161**	.092**	.133**	.185**
	Sig. (2-tailed)	5.40144e-16	1.10833e-22	8.55507e-68	1.61107e-24	1.35491e-23	1.00949e-17	9.11901e-26	7.34815e-24	7.32848e-72	4.18778e-33		3.13496e-19	1.4806e-74	1.65212e-37	5.76978e-53	1.87214e-30	8.70456e-36	1.40144e-10	1.65008e-43	1.53274e-12	6.48018e-05	3.22429e-18	7.62187e-36	3.89544e-11	8.43929e-31	3.71357e-07	4.52034e-20	6.15924e-15	8.69417e-06	9.22151e-11	3.34636e-19
	N	2083	2341	2341	2065	2335	2074	2338	2241	2346	2341	2353	2339	2347	2338	2329	2339	2317	2336	2347	2330	2295	2342	2342	2324	2341	2330	2332	2317	2333	2346	2314
Physical exercise	Pearson Correlation	.236**	.221**	.221**	.203**	.278**	.066**	.381**	.206**	.132**	.242**	.184**	1	.219**	.128**	.144**	.118**	.262**	.243**	-0.0303489	-0.0115537	.124**	.090**	.300**	.064**	.231**	.215**	.200**	.240**	.234**	-0.0120027	.286**
	Sig. (2-tailed)	7.59394e-28	2.75425e-27	3.17703e-27	9.84274e-21	9.87383e-43	0.0026097	8.93247e-82	6.37588e-23	1.27237e-10	1.35762e-32	3.13496e-19		9.38531e-27	4.73133e-10	2.85495e-12	9.25642e-09	9.26958e-38	1.25307e-32	0.141946	0.577241	2.71918e-09	1.26642e-05	9.45264e-50	0.00202309	1.0211e-29	7.24747e-26	2.1783e-22	8.94989e-32	2.03745e-30	0.561363	9.7412e-45
	N	2082	2340	2341	2065	2333	2073	2338	2241	2344	2341	2339	2351	2343	2339	2328	2338	2316	2337	2343	2330	2294	2342	2338	2324	2339	2331	2328	2318	2329	2344	2313
Music (producing or listening)	Pearson Correlation	.128**	.108**	.250**	.167**	.171**	.140**	.272**	.246**	.215**	.192**	.364**	.219**	1	.408**	.375**	.257**	.353**	.173**	.176**	.102**	.130**	.182**	.195**	.117**	.217**	.134**	.244**	.159**	.124**	.087**	.158**
	Sig. (2-tailed)	4.13372e-09	1.41088e-07	1.23081e-34	2.2693e-14	1.04493e-16	1.32665e-10	6.17166e-41	2.5262e-32	5.92841e-26	8.13054e-21	1.4806e-74	9.38531e-27		7.70143e-95	1.31785e-78	8.95941e-37	6.54827e-69	3.35003e-17	7.70702e-18	7.14661e-07	3.76868e-10	5.143e-19	1.44861e-21	1.57023e-08	1.75038e-26	9.3852e-11	4.61827e-33	1.23729e-14	1.6275e-09	2.67023e-05	2.37056e-14
	N	2088	2346	2344	2071	2337	2075	2341	2245	2350	2344	2347	2343	2356	2342	2333	2342	2321	2339	2350	2333	2297	2346	2345	2326	2345	2334	2336	2321	2334	2349	2318
Art (creating or viewing)	Pearson Correlation	.107**	.053*	.210**	.118**	.190**	.140**	.265**	.125**	.199**	.207**	.260**	.128**	.408**	1	.496**	.320**	.329**	.290**	.158**	.106**	.176**	.232**	.180**	.044*	.219**	-.060**	.143**	.102**	0.0280215	.111**	.141**
	Sig. (2-tailed)	9.44558e-07	0.0105252	1.00739e-24	7.93052e-08	2.75878e-20	1.74462e-10	6.70685e-39	2.79857e-09	2.90594e-22	3.88012e-24	1.65212e-37	4.73133e-10	7.70143e-95		2.95748e-145	1.12766e-56	1.82669e-59	1.29007e-46	1.63244e-14	2.64592e-07	2.09209e-17	5.41116e-30	1.85172e-18	0.0336808	8.59351e-27	0.0035143	4.15271e-12	8.79607e-07	0.176331	8.19457e-08	1.12483e-11
	N	2081	2337	2338	2064	2330	2072	2335	2242	2340	2338	2338	2339	2342	2348	2330	2337	2318	2336	2340	2327	2292	2339	2337	2321	2340	2332	2329	2316	2330	2342	2312
Theatre or other live performance	Pearson Correlation	.155**	.141**	.335**	.222**	.225**	.150**	.225**	.159**	.242**	.163**	.310**	.144**	.375**	.496**	1	.338**	.445**	.183**	.225**	.155**	.137**	.139**	.211**	.112**	.262**	.042*	.279**	.174**	.103**	.132**	.267**
	Sig. (2-tailed)	1.05165e-12	8.09712e-12	2.37148e-62	1.99177e-24	4.13357e-28	6.98792e-12	3.37605e-28	4.28277e-14	2.16241e-32	2.13191e-15	5.76978e-53	2.85495e-12	1.31785e-78	2.95748e-145		3.58171e-63	5.67678e-113	4.93352e-19	3.75534e-28	6.98067e-14	4.59805e-11	1.70022e-11	8.55728e-25	7.00753e-08	4.9199e-38	0.0438963	5.88378e-43	4.65252e-17	6.7705e-07	1.36715e-10	5.06341e-39
	N	2078	2330	2329	2063	2324	2067	2328	2237	2333	2328	2329	2328	2333	2330	2340	2328	2315	2328	2333	2321	2287	2329	2330	2313	2334	2322	2325	2308	2325	2333	2309
Reading	Pearson Correlation	.143**	.146**	.192**	.162**	.081**	.141**	.237**	0.0166202	.188**	.148**	.234**	.118**	.257**	.320**	.338**	1	.240**	.233**	.181**	.111**	.106**	.315**	.197**	0.0311954	.163**	-0.0140427	0.00408936	.135**	0.00277579	0.0195014	.104**
	Sig. (2-tailed)	4.99712e-11	1.45512e-12	6.20984e-21	1.33821e-13	8.43156e-05	1.17781e-10	4.42893e-31	0.431426	4.34369e-20	5.46457e-13	1.87214e-30	9.25642e-09	8.95941e-37	1.12766e-56	3.58171e-63		1.33087e-31	3.29637e-30	1.05247e-18	7.09628e-08	4.01228e-07	6.09111e-55	8.66275e-22	0.132814	2.09728e-15	0.49808	0.843635	6.15546e-11	0.893492	0.345198	5.09102e-07
	N	2081	2338	2339	2064	2332	2072	2337	2243	2342	2341	2339	2338	2342	2337	2328	2350	2315	2339	2343	2330	2290	2341	2337	2323	2339	2330	2329	2316	2329	2345	2311
Dancing	Pearson Correlation	.173**	.141**	.302**	.221**	.234**	.122**	.249**	.175**	.191**	.151**	.255**	.262**	.353**	.329**	.445**	.240**	1	.266**	.163**	.087**	.191**	.113**	.162**	.119**	.229**	-0.016337	.375**	.165**	.124**	.172**	.254**
	Sig. (2-tailed)	2.46091e-15	9.95201e-12	5.17669e-50	3.95231e-24	4.91963e-30	2.80891e-08	4.81758e-34	7.41958e-17	1.85677e-20	3.05078e-13	8.70456e-36	9.26958e-38	6.54827e-69	1.82669e-59	5.67678e-113	1.33087e-31		7.50707e-39	2.68772e-15	2.902e-05	3.26967e-20	5.08096e-08	4.67265e-15	9.24175e-09	7.41473e-29	0.432658	3.4489e-78	1.5204e-15	2.21799e-09	6.51277e-17	4.98364e-35
	N	2074	2317	2316	2057	2309	2057	2314	2230	2321	2316	2317	2316	2321	2318	2315	2315	2327	2317	2322	2309	2276	2316	2316	2301	2319	2309	2313	2298	2313	2320	2297
Gardening or caring for plants	Pearson Correlation	.183**	.161**	.148**	.181**	.167**	.138**	.444**	.083**	.129**	.289**	.132**	.243**	.173**	.290**	.183**	.233**	.266**	1	.080**	0.0211165	.137**	.231**	.292**	.072**	.228**	0.00921837	.069**	.173**	.072**	-0.00836986	.114**
	Sig. (2-tailed)	3.82616e-17	5.60419e-15	7.05804e-13	1.16075e-16	5.07883e-16	2.55771e-10	1.77048e-113	7.57902e-05	3.79671e-10	2.6319e-46	1.40144e-10	1.25307e-32	3.35003e-17	1.29007e-46	4.93352e-19	3.29637e-30	7.50707e-39		0.000102573	0.308166	4.25203e-11	1.02936e-29	2.78698e-47	0.00049321	6.14519e-29	0.656575	0.000823007	5.63007e-17	0.000520953	0.685592	4.04779e-08
	N	2081	2336	2337	2065	2330	2077	2335	2243	2340	2339	2336	2337	2339	2336	2328	2339	2317	2348	2340	2331	2292	2339	2335	2322	2338	2329	2329	2314	2328	2342	2312
Watching movies or TV	Pearson Correlation	.063**	.085**	.208**	.144**	.083**	.123**	0.00836153	.050*	.284**	.089**	.280**	-0.0303489	.176**	.158**	.225**	.181**	.163**	.080**	1	.326**	.049*	.144**	.141**	.125**	.149**	.081**	.138**	.084**	-0.00974188	.294**	.141**
	Sig. (2-tailed)	0.0040611	3.63276e-05	3.16047e-24	4.0627e-11	5.77437e-05	1.77266e-08	0.685889	0.0187758	6.67835e-45	1.63497e-05	1.65008e-43	0.141946	7.70702e-18	1.63244e-14	3.75534e-28	1.05247e-18	2.68772e-15	0.000102573		4.71431e-59	0.0190744	2.38547e-12	6.12413e-12	1.61162e-09	4.56413e-13	8.20778e-05	1.8346e-11	5.41069e-05	0.637994	3.60047e-48	7.96789e-12
	N	2088	2345	2345	2071	2339	2077	2342	2245	2350	2345	2347	2343	2350	2340	2333	2343	2322	2340	2357	2336	2298	2346	2345	2328	2345	2334	2335	2321	2335	2350	2319
Using social media	Pearson Correlation	.100**	.087**	.123**	.096**	.123**	.054*	-.047*	-0.00688278	.167**	.077**	.146**	-0.0115537	.102**	.106**	.155**	.111**	.087**	0.0211165	.326**	1	0.0341205	.084**	.112**	.143**	.162**	.087**	.131**	.111**	0.0277023	.232**	.098**
	Sig. (2-tailed)	5.02164e-06	2.43645e-05	2.64883e-09	1.31734e-05	3.06006e-09	0.014695	0.024579	0.744856	3.91603e-16	0.000191505	1.53274e-12	0.577241	7.14661e-07	2.64592e-07	6.98067e-14	7.09628e-08	2.902e-05	0.308166	4.71431e-59		0.102975	4.85181e-05	5.86716e-08	5.22246e-12	4.44334e-15	2.81738e-05	2.62577e-10	8.85448e-08	0.182062	6.24559e-30	2.33094e-06
	N	2078	2330	2331	2062	2324	2069	2328	2238	2334	2334	2330	2330	2333	2327	2321	2330	2309	2331	2336	2342	2285	2333	2330	2314	2329	2322	2320	2308	2322	2335	2307
Religion or spirituality	Pearson Correlation	.159**	.097**	.098**	.106**	.138**	0.00711125	.149**	.044*	.041*	.074**	.083**	.124**	.130**	.176**	.137**	.106**	.191**	.137**	.049*	0.0341205	1	.152**	.107**	-.062**	.204**	0.00618799	0.0177327	.188**	.055**	.061**	.160**
	Sig. (2-tailed)	4.24754e-13	3.60648e-06	2.45303e-06	1.50526e-06	3.96996e-11	0.747855	8.92834e-13	0.0390838	0.0472843	0.000362769	6.48018e-05	2.71918e-09	3.76868e-10	2.09209e-17	4.59805e-11	4.01228e-07	3.26967e-20	4.25203e-11	0.0190744	0.102975		2.24598e-13	3.07515e-07	0.00328101	5.61738e-23	0.767161	0.396541	1.25499e-19	0.00849006	0.00353336	1.35897e-14
	N	2055	2294	2295	2040	2288	2046	2292	2205	2298	2294	2295	2294	2297	2292	2287	2290	2276	2292	2298	2285	2305	2295	2297	2282	2296	2292	2288	2275	2291	2297	2276
Spending quiet time alone	Pearson Correlation	.096**	.067**	.053*	.072**	-0.0183196	.106**	.258**	0.00511843	.149**	.142**	.178**	.090**	.182**	.232**	.139**	.315**	.113**	.231**	.144**	.084**	.152**	1	.272**	-0.0128142	.156**	-0.00449326	-.065**	.065**	0.0146174	0.0353271	0.00235458
	Sig. (2-tailed)	1.1003e-05	0.00112901	0.0100281	0.00101531	0.376141	1.21348e-06	5.80587e-37	0.808524	4.61664e-13	4.3639e-12	3.22429e-18	1.26642e-05	5.143e-19	5.41116e-30	1.70022e-11	6.09111e-55	5.08096e-08	1.02936e-29	2.38547e-12	4.85181e-05	2.24598e-13		6.63202e-41	0.536857	3.85246e-14	0.828239	0.00157491	0.00168011	0.480564	0.0870679	0.909869
	N	2084	2342	2343	2067	2336	2073	2340	2244	2346	2344	2342	2342	2346	2339	2329	2341	2316	2339	2346	2333	2295	2354	2342	2325	2341	2334	2330	2319	2331	2347	2314
Being productive	Pearson Correlation	.309**	.273**	.259**	.275**	.209**	.101**	.279**	.082**	.211**	.190**	.254**	.300**	.195**	.180**	.211**	.197**	.162**	.292**	.141**	.112**	.107**	.272**	1	.072**	.314**	.054**	.124**	.239**	.106**	.137**	.222**
	Sig. (2-tailed)	1.96958e-47	2.48454e-41	4.01045e-37	3.50685e-37	2.07237e-24	3.69614e-06	3.87366e-43	0.000105417	6.3562e-25	1.48002e-20	7.62187e-36	9.45264e-50	1.44861e-21	1.85172e-18	8.55728e-25	8.66275e-22	4.67265e-15	2.78698e-47	6.12413e-12	5.86716e-08	3.07515e-07	6.63202e-41		0.000552857	6.86498e-55	0.00966111	1.67825e-09	1.71242e-31	2.73419e-07	2.64154e-11	2.49937e-27
	N	2082	2340	2342	2065	2334	2074	2338	2241	2346	2340	2342	2338	2345	2337	2330	2337	2316	2335	2345	2330	2297	2342	2352	2321	2342	2331	2331	2317	2333	2344	2316
Using alcohol or other drugs	Pearson Correlation	.056*	0.0358946	.172**	.118**	.137**	0.0213895	.051*	.200**	.304**	.190**	.137**	.064**	.117**	.044*	.112**	0.0311954	.119**	.072**	.125**	.143**	-.062**	-0.0128142	.072**	1	.151**	.135**	.375**	0.0391858	.227**	.090**	.063**
	Sig. (2-tailed)	0.0101994	0.0837583	6.13138e-17	6.76416e-08	3.5935e-11	0.331061	0.0140037	1.07439e-21	6.9206e-51	2.56411e-20	3.89544e-11	0.00202309	1.57023e-08	0.0336808	7.00753e-08	0.132814	9.24175e-09	0.00049321	1.61162e-09	5.22246e-12	0.00328101	0.536857	0.000552857		2.36701e-13	7.3643e-11	1.65431e-78	0.0600794	1.42248e-28	1.33983e-05	0.00240319
	N	2081	2322	2324	2064	2317	2067	2321	2237	2327	2324	2324	2324	2326	2321	2313	2323	2301	2322	2328	2314	2282	2325	2321	2334	2323	2315	2318	2303	2317	2329	2298
Caring for others	Pearson Correlation	.210**	.319**	.322**	.260**	.284**	.106**	.242**	.168**	.204**	.291**	.235**	.231**	.217**	.219**	.262**	.163**	.229**	.228**	.149**	.162**	.204**	.156**	.314**	.151**	1	.162**	.215**	.379**	.176**	.122**	.259**
	Sig. (2-tailed)	4.02138e-22	1.36122e-56	1.1973e-57	2.96254e-33	1.91628e-44	1.37853e-06	2.11119e-32	1.34656e-15	1.67304e-23	7.60507e-47	8.43929e-31	1.0211e-29	1.75038e-26	8.59351e-27	4.9199e-38	2.09728e-15	7.41473e-29	6.14519e-29	4.56413e-13	4.44334e-15	5.61738e-23	3.85246e-14	6.86498e-55	2.36701e-13		3.6871e-15	1.07049e-25	4.47918e-80	1.32856e-17	3.57877e-09	5.74217e-37
	N	2084	2342	2340	2068	2334	2075	2338	2244	2345	2340	2341	2339	2345	2340	2334	2339	2319	2338	2345	2329	2296	2341	2342	2323	2352	2332	2334	2320	2334	2345	2322
Watching sport	Pearson Correlation	.061**	.157**	.093**	.083**	.120**	-0.0138915	0.00864593	.128**	.063**	.110**	.105**	.215**	.134**	-.060**	.042*	-0.0140427	-0.016337	0.00921837	.081**	.087**	0.00618799	-0.00449326	.054**	.135**	.162**	1	.208**	.164**	.180**	.043*	.276**
	Sig. (2-tailed)	0.00528453	2.15464e-14	7.51596e-06	0.000177063	7.08599e-09	0.527701	0.676588	1.37632e-09	0.00216386	1.11829e-07	3.71357e-07	7.24747e-26	9.3852e-11	0.0035143	0.0438963	0.49808	0.432658	0.656575	8.20778e-05	2.81738e-05	0.767161	0.828239	0.00966111	7.3643e-11	3.6871e-15		3.55748e-24	2.40441e-15	2.29783e-18	0.0356457	1.3209e-41
	N	2076	2331	2332	2059	2325	2069	2330	2238	2334	2332	2330	2331	2334	2332	2322	2330	2309	2329	2334	2322	2292	2334	2331	2315	2332	2342	2322	2309	2322	2336	2306
Parties, festivals, or clubbing	Pearson Correlation	.108**	.121**	.304**	.195**	.382**	0.0384189	.121**	.267**	.211**	.165**	.188**	.200**	.244**	.143**	.279**	0.00408936	.375**	.069**	.138**	.131**	0.0177327	-.065**	.124**	.375**	.215**	.208**	1	.168**	.339**	.188**	.337**
	Sig. (2-tailed)	7.36698e-07	4.28321e-09	4.82242e-51	3.41317e-19	1.73331e-81	0.0806897	4.34759e-09	1.08688e-37	7.00656e-25	1.2684e-15	4.52034e-20	2.1783e-22	4.61827e-33	4.15271e-12	5.88378e-43	0.843635	3.4489e-78	0.000823007	1.8346e-11	2.62577e-10	0.396541	0.00157491	1.67825e-09	1.65431e-78	1.07049e-25	3.55748e-24		5.2953e-16	1.04913e-63	6.19694e-20	1.98722e-62
	N	2077	2330	2330	2061	2325	2068	2328	2235	2335	2329	2332	2328	2336	2329	2325	2329	2313	2329	2335	2320	2288	2330	2331	2318	2334	2322	2341	2310	2327	2335	2313
Spending time with a child or children	Pearson Correlation	.200**	.466**	.250**	.230**	.205**	-.061**	.192**	.151**	.074**	.138**	.161**	.240**	.159**	.102**	.174**	.135**	.165**	.173**	.084**	.111**	.188**	.065**	.239**	0.0391858	.379**	.164**	.168**	1	.157**	0.0320335	.238**
	Sig. (2-tailed)	3.21328e-20	2.19791e-125	2.46005e-34	3.28652e-26	2.18171e-23	0.00590002	1.01169e-20	8.19228e-13	0.000364778	2.38663e-11	6.15924e-15	8.94989e-32	1.23729e-14	8.79607e-07	4.65252e-17	6.15546e-11	1.5204e-15	5.63007e-17	5.41069e-05	8.85448e-08	1.25499e-19	0.00168011	1.71242e-31	0.0600794	4.47918e-80	2.40441e-15	5.2953e-16		2.73071e-14	0.12279	6.59152e-31
	N	2074	2319	2320	2059	2312	2056	2316	2229	2321	2319	2317	2318	2321	2316	2308	2316	2298	2314	2321	2308	2275	2319	2317	2303	2320	2309	2310	2329	2315	2322	2299
Risk-taking	Pearson Correlation	.121**	.070**	.110**	.133**	.272**	-0.0048354	.131**	.246**	.088**	.149**	.092**	.234**	.124**	0.0280215	.103**	0.00277579	.124**	.072**	-0.00974188	0.0277023	.055**	0.0146174	.106**	.227**	.176**	.180**	.339**	.157**	1	.093**	.217**
	Sig. (2-tailed)	3.10146e-08	0.000766262	9.25268e-08	1.43872e-09	9.32219e-41	0.826183	1.92935e-10	3.75248e-32	2.08916e-05	4.95424e-13	8.69417e-06	2.03745e-30	1.6275e-09	0.176331	6.7705e-07	0.893492	2.21799e-09	0.000520953	0.637994	0.182062	0.00849006	0.480564	2.73419e-07	1.42248e-28	1.32856e-17	2.29783e-18	1.04913e-63	2.73071e-14		6.35625e-06	3.98268e-26
	N	2078	2330	2332	2061	2325	2065	2329	2236	2335	2330	2333	2329	2334	2330	2325	2329	2313	2328	2335	2322	2291	2331	2333	2317	2334	2322	2327	2315	2342	2336	2312
Shopping	Pearson Correlation	.077**	.063**	.143**	.119**	.083**	.062**	-0.0355182	.070**	.232**	.142**	.133**	-0.0120027	.087**	.111**	.132**	0.0195014	.172**	-0.00836986	.294**	.232**	.061**	0.0353271	.137**	.090**	.122**	.043*	.188**	0.0320335	.093**	1	.173**
	Sig. (2-tailed)	0.000446565	0.00216399	4.02062e-12	5.31727e-08	5.93158e-05	0.00478025	0.0857052	0.000918289	3.45797e-30	5.12464e-12	9.22151e-11	0.561363	2.67023e-05	8.19457e-08	1.36715e-10	0.345198	6.51277e-17	0.685592	3.60047e-48	6.24559e-30	0.00353336	0.0870679	2.64154e-11	1.33983e-05	3.57877e-09	0.0356457	6.19694e-20	0.12279	6.35625e-06		5.39418e-17
	N	2087	2345	2346	2070	2338	2076	2342	2247	2349	2346	2346	2344	2349	2342	2333	2345	2320	2342	2350	2335	2297	2347	2344	2329	2345	2336	2335	2322	2336	2357	2319
Belonging to a group, club, or team	Pearson Correlation	.182**	.190**	.357**	.270**	.351**	.090**	.180**	.144**	.158**	.103**	.185**	.286**	.158**	.141**	.267**	.104**	.254**	.114**	.141**	.098**	.160**	0.00235458	.222**	.063**	.259**	.276**	.337**	.238**	.217**	.173**	1
	Sig. (2-tailed)	8.90494e-17	2.5501e-20	1.21261e-70	1.36492e-35	4.90448e-68	4.05177e-05	3.03618e-18	1.03383e-11	2.05775e-14	6.17942e-07	3.34636e-19	9.7412e-45	2.37056e-14	1.12483e-11	5.06341e-39	5.09102e-07	4.98364e-35	4.04779e-08	7.96789e-12	2.33094e-06	1.35897e-14	0.909869	2.49937e-27	0.00240319	5.74217e-37	1.3209e-41	1.98722e-62	6.59152e-31	3.98268e-26	5.39418e-17
	N	2066	2315	2315	2052	2309	2057	2312	2221	2318	2314	2314	2313	2318	2312	2309	2311	2297	2312	2319	2307	2276	2314	2316	2298	2322	2306	2313	2299	2312	2319	2325

## Sheet: Info
Data from the National Pleasure Audit (Australia)
The Pleasure Sources Assessment
Authors: Kozlowski, Provost, and Kern 2025
